# Supplementary material
Source: PubMed Central journal article supplement (PMC4285559)

**Supplementary Table 1.** Primary and Secondary Categories of Primary Implicated Agents in Subjects Who Underwent Liver Transplantation, Died Within 6 Months of Drug-Induced Liver Injury Onset, and Were Alive Within 6 Months of Drug-Induced Liver Injury Onset

| Primary implicated class                     | Liver transplant recipient (n = 30), n (%) | Liver-related death (n = 17), n (%) | Non-liver-related death (n = 15), n (%) | Subjects with follow-up (chronic) (n = 113), n (%) | Subjects with follow-up (nonchronic) (n = 485), n (%) |
|----------------------------------------------|--------------------------------------------|-------------------------------------|-----------------------------------------|----------------------------------------------------|-------------------------------------------------------|
| 1535 Antimicrobial                           | 14/30 (46.7)                               | 9/17 (52.9)                         | 4/15 (26.7)                             | 41/113 (36.3)                                      | 229/484 (47.3)                                        |
| 1536 Antibacterial                           | 5/30 (16.7)                                | 8/17 (47.1)                         | 4/15 (26.7)                             | 33/113 (29.2)                                      | 195/484 (40.3)                                        |
| 1537 Amoxicillin                             | 0                                          | 0                                   | 0                                       | 0                                                  | 5/484 (1.0)                                           |
| 1538 Amoxicillin with clavulanic acid        | 1/30 (3.3)                                 | 0                                   | 0                                       | 5/113 (4.4)                                        | 69/484 (14.3)                                         |
| 1539 Azithromycin                            | 1/30 (3.3)                                 | 0                                   | 0                                       | 2/113 (1.8)                                        | 6/484 (1.2)                                           |
| 1540 Benzathine benzylpenicillin             | 0                                          | 0                                   | 0                                       | 0                                                  | 1/484 (0.2)                                           |
| 1541 Cefaclor                                | 0                                          | 0                                   | 0                                       | 0                                                  | 1/484 (0.2)                                           |
| 1542 Cefadroxil                              | 0                                          | 0                                   | 0                                       | 0                                                  | 1/484 (0.2)                                           |
| 1543 Cefalexin                               | 0                                          | 1/17 (5.9)                          | 0                                       | 1/113 (0.9)                                        | 1/484 (0.2)                                           |
| 1544 Cefazolin                               | 0                                          | 0                                   | 0                                       | 2/113 (1.8)                                        | 14/484 (2.9)                                          |
| 1545 Cefdinir                                | 0                                          | 0                                   | 0                                       | 1/113 (0.9)                                        | 0                                                     |
| 1546 Cefotaxime                              | 0                                          | 1/17 (5.9)                          | 0                                       | 0                                                  | 0                                                     |
| 1547 Ceftriaxone                             | 0                                          | 0                                   | 1/15 (6.7)                              | 0                                                  | 2/484 (0.4)                                           |
| 1548 Cefuroxime                              | 0                                          | 0                                   | 0                                       | 1/113 (0.9)                                        | 1/484 (0.2)                                           |
| 1549 Ciprofloxacin                           | 0                                          | 1/17 (5.9)                          | 1/15 (6.7)                              | 1/113 (0.9)                                        | 8/484 (1.7)                                           |
| 1550 Clindamycin                             | 0                                          | 0                                   | 0                                       | 0                                                  | 2/484 (0.4)                                           |
| 1551 Doxycycline                             | 0                                          | 0                                   | 0                                       | 1/113 (0.9)                                        | 3/484 (0.6)                                           |
| 1552 Erythromycin                            | 0                                          | 1/17 (5.9)                          | 0                                       | 0                                                  | 1/484 (0.2)                                           |
| 1553 Gatifloxacin                            | 0                                          | 0                                   | 0                                       | 0                                                  | 1/484 (0.2)                                           |
| 1554 Levofloxacin                            | 0                                          | 1/17 (5.9)                          | 0                                       | 1/113 (0.9)                                        | 6/484 (1.2)                                           |
| 1555 Meropenem                               | 0                                          | 0                                   | 0                                       | 1/113 (0.9)                                        | 0                                                     |
| 1556 Minocycline                             | 0                                          | 0                                   | 0                                       | 3/113 (2.7)                                        | 15/484 (3.1)                                          |
| 1557 Moxifloxacin                            | 0                                          | 0                                   | 1/15 (6.7)                              | 1/113 (0.9)                                        | 5/484 (1.0)                                           |
| 1558 Nitrofurantoin                          | 2/30 (6.7)                                 | 2/17 (11.8)                         | 1/15 (6.7)                              | 7/113 (6.2)                                        | 23/484 (4.8)                                          |
| 1559 Piperacillin sodium with tazobactam     | 0                                          | 0                                   | 0                                       | 1/113 (0.9)                                        | 4/484 (0.8)                                           |
| 1560 Sulfamethoxazole with trimethoprim      | 0                                          | 1/17 (5.9)                          | 0                                       | 4/113 (3.5)                                        | 20/484 (4.1)                                          |
| 1561 Telithromycin                           | 1/30 (3.3)                                 | 0                                   | 0                                       | 1/113 (0.9)                                        | 4/484 (0.8)                                           |
| 1562 Vancomycin                              | 0                                          | 0                                   | 0                                       | 0                                                  | 2/484 (0.4)                                           |
| 1563 Antifungal                              | 1/30 (3.3)                                 | 0                                   | 0                                       | 2/113 (1.8)                                        | 5/484 (1.0)                                           |
| 1564 Fluconazole                             | 0                                          | 0                                   | 0                                       | 0                                                  | 1/484 (0.2)                                           |
| 1565 Terbinafine                             | 1/30 (3.3)                                 | 0                                   | 0                                       | 2/113 (1.8)                                        | 3/484 (0.6)                                           |
| 1566 Voriconazole                            | 0                                          | 0                                   | 0                                       | 0                                                  | 1/484 (0.2)                                           |
| 1567 Antimycobacterial: leprosy              | 0                                          | 0                                   | 0                                       | 0                                                  | 2/484 (0.4)                                           |
| 1568 Dapsone                                 | 0                                          | 0                                   | 0                                       | 0                                                  | 2/484 (0.4)                                           |
| 1569 Antimycobacterial: tuberculosis         | 7/30 (23.3)                                | 1/17 (5.9)                          | 0                                       | 3/113 (2.7)                                        | 22/484 (4.5)                                          |
| 1570 Ethambutol                              | 0                                          | 0                                   | 0                                       | 0                                                  | 1/484 (0.2)                                           |
| 1571 Isoniazid                               | 7/30 (23.3)                                | 0                                   | 0                                       | 3/113 (2.7)                                        | 18/484 (3.7)                                          |
| 1572 Isoniazid with rifampicin               | 0                                          | 1/17 (5.9)                          | 0                                       | 0                                                  | 0                                                     |
| 1573 Pyrazinamide                            | 0                                          | 0                                   | 0                                       | 0                                                  | 2/484 (0.4)                                           |
| 1574 Rifampicin                              | 0                                          | 0                                   | 0                                       | 0                                                  | 1/484 (0.2)                                           |
| 1575 Antiviral: human immunodeficiency virus | 1/30 (3.3)                                 | 0                                   | 0                                       | 3/113 (2.7)                                        | 3/484 (0.6)                                           |
| 1576 Atazanavir                              | 0                                          | 0                                   | 0                                       | 1/113 (0.9)                                        | 0                                                     |
| 1577 Atripla                                 | 1/30 (3.3)                                 | 0                                   | 0                                       | 0                                                  | 0                                                     |
| 1578 Darunavir                               | 0                                          | 0                                   | 0                                       | 1/113 (0.9)                                        | 1/484 (0.2)                                           |
| 1579 Didanosine                              | 0                                          | 0                                   | 0                                       | 1/113 (0.9)                                        | 0                                                     |
| 1580 Nelfinavir                              | 0                                          | 0                                   | 0                                       | 0                                                  | 1/484 (0.2)                                           |
| 1581 Nevirapine                              | 0                                          | 0                                   | 0                                       | 0                                                  | 1/484 (0.2)                                           |
| 1582 Antiviral: herpes                       | 0                                          | 0                                   | 0                                       | 0                                                  | 2/484 (0.4)                                           |
| 1583 Aciclovir                               | 0                                          | 0                                   | 0                                       | 0                                                  | 1/484 (0.2)                                           |
| 1584 Valaciclovir                            | 0                                          | 0                                   | 0                                       | 0                                                  | 1/484 (0.2)                                           |
| 1585 HDS <sup>a</sup>                        | 8/30 (26.7)                                | 1/17 (5.9)                          | 1/15 (6.7)                              | 18/113 (15.9)                                      | 80/484 (16.5)                                         |
| 1586 Cardiovascular                          | 2/30 (6.7)                                 | 2/17 (11.8)                         | 1/15 (6.7)                              | 14/113 (12.4)                                      | 52/484 (10.7)                                         |
| 1587 Anti-arrhythmic                         | 0                                          | 1/17 (5.9)                          | 1/15 (6.7)                              | 0                                                  | 5/484 (1.0)                                           |
| 1588 Amiodarone                              | 0                                          | 1/17 (5.9)                          | 1/15 (6.7)                              | 0                                                  | 3/484 (0.6)                                           |
| 1589 Dronedarone                             | 0                                          | 0                                   | 0                                       | 0                                                  | 2/484 (0.4)                                           |
| 1590 Antihypertensive                        | 2/30 (6.7)                                 | 0                                   | 0                                       | 7/113 (6.2)                                        | 22/484 (4.5)                                          |

Supplementary Table 1. Continued

| Primary implicated class | Liver transplant recipient<br>(n = 30), n (%) | Liver-related death<br>(n = 17), n (%) | Non-liver-related death<br>(n = 15), n (%) | Subjects with follow-up<br>(chronic)<br>(n = 113), n (%) | Subjects with follow-up<br>(nonchronic)<br>(n = 485), n (%) |              |      |
|--------------------------|-----------------------------------------------|----------------------------------------|--------------------------------------------|----------------------------------------------------------|-------------------------------------------------------------|--------------|------|
| 1653                     |                                               |                                        |                                            |                                                          | 1712                                                        |              |      |
| 1654                     |                                               |                                        |                                            |                                                          | 1713                                                        |              |      |
| 1655                     |                                               |                                        |                                            |                                                          | 1714                                                        |              |      |
| 1656                     |                                               |                                        |                                            |                                                          | 1715                                                        |              |      |
| 1657                     |                                               |                                        |                                            |                                                          | 1716                                                        |              |      |
| 1658                     |                                               |                                        |                                            |                                                          | 1717                                                        |              |      |
| 1659                     | Aliskiren                                     | 0                                      | 0                                          | 0                                                        | 1/484 (0.2)                                                 | 1718         |      |
| 1660                     | Amlodipine                                    | 0                                      | 0                                          | 1/113 (0.9)                                              | 0                                                           | 1719         |      |
| 1661                     | Atenolol                                      | 0                                      | 0                                          | 0                                                        | 1/484 (0.2)                                                 | 1720         |      |
| 1662                     | Benazepril                                    | 0                                      | 0                                          | 1/113 (0.9)                                              | 0                                                           | 1721         |      |
| 1662                     | Carvedilol                                    | 0                                      | 0                                          | 0                                                        | 1/484 (0.2)                                                 | 1721         |      |
| 1663                     | Enalapril                                     | 0                                      | 0                                          | 1/113 (0.9)                                              | 0                                                           | 1722         |      |
| 1664                     | Hydralazine                                   | 1/30 (3.3)                             | 0                                          | 1/113 (0.9)                                              | 4/484 (0.8)                                                 | 1723         |      |
| 1665                     | Irbesartan                                    | 0                                      | 0                                          | 0                                                        | 1/484 (0.2)                                                 | 1724         |      |
| 1666                     | Labetalol                                     | 0                                      | 0                                          | 0                                                        | 1/484 (0.2)                                                 | 1725         |      |
| 1667                     | Lisinopril                                    | 0                                      | 0                                          | 1/113 (0.9)                                              | 2/484 (0.4)                                                 | 1726         |      |
| 1667                     | Lisinopril with hydrochlorothiazide           | 1/30 (3.3)                             | 0                                          | 0                                                        | 0                                                           | 1726         |      |
| 1668                     | Methyldopa                                    | 0                                      | 0                                          | 2/113 (1.8)                                              | 7/484 (1.4)                                                 | 1727         |      |
| 1669                     | Valsartan                                     | 0                                      | 0                                          | 0                                                        | 1/484 (0.2)                                                 | 1728         |      |
| 1670                     | Verapamil                                     | 0                                      | 0                                          | 0                                                        | 3/484 (0.6)                                                 | 1729         |      |
| 1671                     | Lipid-lowering agent                          | 0                                      | 0                                          | 7/113 (6.2)                                              | 24/484 (5.0)                                                | 1730         |      |
| 1672                     | Atorvastatin                                  | 0                                      | 0                                          | 0                                                        | 6/484 (1.2)                                                 | 1731         |      |
| 1672                     | Fenofibrate                                   | 0                                      | 0                                          | 1/113 (0.9)                                              | 2/484 (0.4)                                                 | 1731         |      |
| 1673                     | Fluvastatin                                   | 0                                      | 0                                          | 1/113 (0.9)                                              | 1/484 (0.2)                                                 | 1732         |      |
| 1674                     | Gemfibrozil                                   | 0                                      | 0                                          | 0                                                        | 1/484 (0.2)                                                 | 1733         |      |
| 1675                     | Lovastatin                                    | 0                                      | 0                                          | 0                                                        | 2/484 (0.4)                                                 | 1734         |      |
| 1676                     | Nicotinic acid                                | 0                                      | 0                                          | 0                                                        | 2/484 (0.4)                                                 | 1735         |      |
| 1677                     | Pravastatin                                   | 0                                      | 0                                          | 1/113 (0.9)                                              | 1/484 (0.2)                                                 | 1736         |      |
| 1678                     | Rosuvastatin                                  | 0                                      | 0                                          | 4/113 (3.5)                                              | 3/484 (0.6)                                                 | 1737         |      |
| 1679                     | Simvastatin                                   | 0                                      | 0                                          | 0                                                        | 6/484 (1.2)                                                 | 1738         |      |
| 1680                     | Lipid-lowering agents                         | 0                                      | 1/17 (5.9)                                 | 0                                                        | 1/484 (0.2)                                                 | 1739         |      |
| 1681                     | Ezetimibe with simvastatin                    | 0                                      | 1/17 (5.9)                                 | 0                                                        | 1/484 (0.2)                                                 | 1739         |      |
| 1681                     | Central nervous system                        | 3/30 (10.0)                            | 1/17 (5.9)                                 | 2/15 (13.3)                                              | 5/113 (4.4)                                                 | 40/484 (8.3) | 1740 |
| 1682                     | Attention deficit hyperactivity disorder      | 0                                      | 0                                          | 0                                                        | 1/113 (0.9)                                                 | 1/484 (0.2)  | 1741 |
| 1683                     | Atomoxetine                                   | 0                                      | 0                                          | 0                                                        | 1/113 (0.9)                                                 | 0            | 1742 |
| 1684                     | Dexmethylphenidate                            | 0                                      | 0                                          | 0                                                        | 0                                                           | 1/484 (0.2)  | 1743 |
| 1685                     | Anesthetic                                    | 0                                      | 0                                          | 0                                                        | 0                                                           | 5/484 (1.0)  | 1744 |
| 1686                     | Isoflurane                                    | 0                                      | 0                                          | 0                                                        | 0                                                           | 2/484 (0.4)  | 1745 |
| 1687                     | Ketamine                                      | 0                                      | 0                                          | 0                                                        | 0                                                           | 1/484 (0.2)  | 1746 |
| 1687                     | Sevoflurane                                   | 0                                      | 0                                          | 0                                                        | 0                                                           | 2/484 (0.4)  | 1746 |
| 1688                     | Anticonvulsant                                | 3/30 (10.0)                            | 0                                          | 2/15 (13.3)                                              | 1/113 (0.9)                                                 | 13/484 (2.7) | 1747 |
| 1689                     | Carbamazepine                                 | 0                                      | 0                                          | 2/15 (13.3)                                              | 0                                                           | 0            | 1748 |
| 1690                     | Gabapentin                                    | 0                                      | 0                                          | 0                                                        | 1/113 (0.9)                                                 | 0            | 1749 |
| 1691                     | Lamotrigine                                   | 0                                      | 0                                          | 0                                                        | 0                                                           | 5/484 (1.0)  | 1750 |
| 1692                     | Phenytoin                                     | 1/30 (3.3)                             | 0                                          | 0                                                        | 0                                                           | 5/484 (1.0)  | 1751 |
| 1693                     | Pregabalin                                    | 0                                      | 0                                          | 0                                                        | 0                                                           | 1/484 (0.2)  | 1752 |
| 1694                     | Topiramate                                    | 1/30 (3.3)                             | 0                                          | 0                                                        | 0                                                           | 0            | 1753 |
| 1694                     | Valproic acid                                 | 1/30 (3.3)                             | 0                                          | 0                                                        | 0                                                           | 2/484 (0.4)  | 1753 |
| 1695                     | Antidepressant                                | 0                                      | 1/17 (5.9)                                 | 0                                                        | 2/113 (1.8)                                                 | 13/484 (2.7) | 1754 |
| 1696                     | Bupropion                                     | 0                                      | 1/17 (5.9)                                 | 0                                                        | 0                                                           | 4/484 (0.8)  | 1755 |
| 1697                     | Duloxetine                                    | 0                                      | 0                                          | 0                                                        | 2/113 (1.8)                                                 | 5/484 (1.0)  | 1756 |
| 1698                     | Escitalopram                                  | 0                                      | 0                                          | 0                                                        | 0                                                           | 2/484 (0.4)  | 1757 |
| 1699                     | Imipramine                                    | 0                                      | 0                                          | 0                                                        | 0                                                           | 1/484 (0.2)  | 1758 |
| 1700                     | Trazodone                                     | 0                                      | 0                                          | 0                                                        | 0                                                           | 1/484 (0.2)  | 1759 |
| 1701                     | Antipsychotic                                 | 0                                      | 0                                          | 0                                                        | 1/113 (0.9)                                                 | 4/484 (0.8)  | 1760 |
| 1702                     | Olanzapine                                    | 0                                      | 0                                          | 0                                                        | 1/113 (0.9)                                                 | 1/484 (0.2)  | 1761 |
| 1702                     | Quetiapine                                    | 0                                      | 0                                          | 0                                                        | 0                                                           | 3/484 (0.6)  | 1761 |
| 1703                     | Muscle relaxant                               | 0                                      | 0                                          | 0                                                        | 0                                                           | 3/484 (0.6)  | 1762 |
| 1704                     | Baclofen                                      | 0                                      | 0                                          | 0                                                        | 0                                                           | 1/484 (0.2)  | 1763 |
| 1705                     | Dantrolene                                    | 0                                      | 0                                          | 0                                                        | 0                                                           | 1/484 (0.2)  | 1764 |
| 1706                     | Metaxalone                                    | 0                                      | 0                                          | 0                                                        | 0                                                           | 1/484 (0.2)  | 1765 |
| 1707                     | Stimulant                                     | 0                                      | 0                                          | 0                                                        | 0                                                           | 1/484 (0.2)  | 1766 |
| 1707                     | Modafinil                                     | 0                                      | 0                                          | 0                                                        | 0                                                           | 1/484 (0.2)  | 1766 |
| 1708                     | Antineoplastic                                | 0                                      | 2/17 (11.8)                                | 5/15 (33.3)                                              | 13/113 (11.5)                                               | 15/484 (3.1) | 1767 |
| 1709                     |                                               |                                        |                                            |                                                          |                                                             |              | 1768 |
| 1710                     |                                               |                                        |                                            |                                                          |                                                             |              | 1769 |
| 1711                     |                                               |                                        |                                            |                                                          |                                                             |              | 1770 |

Supplementary Table 1. Continued

| 1771 |                                    |                  |                 |                 |                  |                  | 1830 |
|------|------------------------------------|------------------|-----------------|-----------------|------------------|------------------|------|
| 1772 |                                    |                  |                 |                 |                  |                  | 1831 |
| 1773 | Primary implicated class           | Liver transplant | Liver-related   | Non-liver-      | Subjects with    | Subjects         | 1832 |
| 1774 | Secondary implicated class         | recipient        | death           | related death   | follow-up        | with follow-up   | 1833 |
| 1775 | Primary implicated agent           | (n = 30), n (%)  | (n = 17), n (%) | (n = 15), n (%) | (chronic)        | (nonchronic)     | 1834 |
| 1776 |                                    |                  |                 |                 | (n = 113), n (%) | (n = 485), n (%) | 1835 |
| 1777 | Brain cancer                       | 0                | 0               | 3/15 (20.0)     | 1/113 (0.9)      | 0                | 1836 |
| 1778 | Temozolomide                       | 0                | 0               | 3/15 (20.0)     | 1/113 (0.9)      | 0                | 1837 |
| 1779 | Breast cancer                      | 0                | 0               | 0               | 4/113 (3.5)      | 1/484 (0.2)      | 1838 |
| 1780 | Exemestane                         | 0                | 0               | 0               | 1/113 (0.9)      | 0                | 1839 |
| 1781 | Letrozole                          | 0                | 0               | 0               | 0                | 1/484 (0.2)      | 1840 |
| 1782 | Tamoxifen                          | 0                | 0               | 0               | 3/113 (2.7)      | 0                | 1841 |
| 1783 | Leukemia                           | 0                | 0               | 0               | 3/113 (2.7)      | 11/484 (2.3)     | 1842 |
| 1784 | Imatinib                           | 0                | 0               | 0               | 1/113 (0.9)      | 3/484 (0.6)      | 1843 |
| 1785 | Mercaptopurine                     | 0                | 0               | 0               | 1/113 (0.9)      | 7/484 (1.4)      | 1844 |
| 1786 | Methotrexate                       | 0                | 0               | 0               | 1/113 (0.9)      | 1/484 (0.2)      | 1845 |
| 1787 | Leukemia, lymphoma                 | 0                | 0               | 1/15 (6.7)      | 1/113 (0.9)      | 0                | 1846 |
| 1788 | Asparaginase                       | 0                | 0               | 1/15 (6.7)      | 1/113 (0.9)      | 0                | 1847 |
| 1789 | Multiple myeloma                   | 0                | 0               | 1/15 (6.7)      | 0                | 0                | 1848 |
| 1790 | Thalidomide                        | 0                | 0               | 1/15 (6.7)      | 0                | 0                | 1849 |
| 1791 | Prostate cancer                    | 0                | 0               | 0               | 1/113 (0.9)      | 0                | 1850 |
| 1792 | Bicalutamide                       | 0                | 0               | 0               | 1/113 (0.9)      | 0                | 1851 |
| 1793 | Solid tumors                       | 0                | 2/17 (11.8)     | 0               | 2/113 (1.8)      | 2/484 (0.4)      | 1852 |
| 1794 | Carboplatin                        | 0                | 1/17 (5.9)      | 0               | 0                | 0                | 1853 |
| 1795 | Imetelstat                         | 0                | 0               | 0               | 0                | 1/484 (0.2)      | 1854 |
| 1796 | Lapatinib                          | 0                | 0               | 0               | 2/113 (1.8)      | 0                | 1855 |
| 1797 | Oxaliplatin                        | 0                | 1/17 (5.9)      | 0               | 0                | 1/484 (0.2)      | 1856 |
| 1798 | Solid tumors, lymphoma             | 0                | 0               | 0               | 1/113 (0.9)      | 1/484 (0.2)      | 1857 |
| 1799 | Cyclophosphamide                   | 0                | 0               | 0               | 1/113 (0.9)      | 1/484 (0.2)      | 1858 |
| 1800 | Analgesic                          | 0                | 0               | 1/15 (6.7)      | 4/113 (3.5)      | 22/484 (4.5)     | 1859 |
| 1801 | Mild to moderate pain              | 0                | 0               | 1/15 (6.7)      | 4/113 (3.5)      | 22/484 (4.5)     | 1860 |
| 1802 | Celecoxib                          | 0                | 0               | 0               | 1/113 (0.9)      | 2/484 (0.4)      | 1861 |
| 1803 | Diclofenac                         | 0                | 0               | 1/15 (6.7)      | 0                | 8/484 (1.7)      | 1862 |
| 1804 | Diclofenac sodium with misoprostol | 0                | 0               | 0               | 1/113 (0.9)      | 2/484 (0.4)      | 1863 |
| 1805 | Etodolac                           | 0                | 0               | 0               | 0                | 2/484 (0.4)      | 1864 |
| 1806 | Flavocoxid                         | 0                | 0               | 0               | 0                | 4/484 (0.8)      | 1865 |
| 1807 | Meloxicam                          | 0                | 0               | 0               | 1/113 (0.9)      | 1/484 (0.2)      | 1866 |
| 1808 | Oxaprozin                          | 0                | 0               | 0               | 0                | 2/484 (0.4)      | 1867 |
| 1809 | Salsalate                          | 0                | 0               | 0               | 0                | 1/484 (0.2)      | 1868 |
| 1810 | Valdecoxib                         | 0                | 0               | 0               | 1/113 (0.9)      | 0                | 1869 |
| 1811 | Immunomodulatory                   | 0                | 1/17 (5.9)      | 0               | 4/113 (3.5)      | 15/484 (3.1)     | 1870 |
| 1812 | Autoimmune disease                 | 0                | 0               | 0               | 1/113 (0.9)      | 3/484 (0.6)      | 1871 |
| 1813 | Adalimumab                         | 0                | 0               | 0               | 0                | 1/484 (0.2)      | 1872 |
| 1814 | Infliximab                         | 0                | 0               | 0               | 1/113 (0.9)      | 2/484 (0.4)      | 1873 |
| 1815 | Multiple sclerosis                 | 0                | 1/17 (5.9)      | 0               | 2/113 (1.8)      | 5/484 (1.0)      | 1874 |
| 1816 | Interferon beta-1a                 | 0                | 1/17 (5.9)      | 0               | 1/113 (0.9)      | 4/484 (0.8)      | 1875 |
| 1817 | Interferon beta-1b                 | 0                | 0               | 0               | 1/113 (0.9)      | 0                | 1876 |
| 1818 | Interleukins                       | 0                | 0               | 0               | 0                | 1/484 (0.2)      | 1877 |
| 1819 | Transplant rejection               | 0                | 0               | 0               | 1/113 (0.9)      | 7/484 (1.4)      | 1878 |
| 1820 | Azathioprine                       | 0                | 0               | 0               | 0                | 7/484 (1.4)      | 1879 |
| 1821 | Tacrolimus                         | 0                | 0               | 0               | 1/113 (0.9)      | 0                | 1880 |
| 1822 | Endocrine                          | 1/30 (3.3)       | 0               | 0               | 5/113 (4.4)      | 9/484 (1.9)      | 1881 |
| 1823 | Anti-thyroid                       | 1/30 (3.3)       | 0               | 0               | 1/113 (0.9)      | 4/484 (0.8)      | 1882 |
| 1824 | Propylthiouracil                   | 1/30 (3.3)       | 0               | 0               | 0                | 2/484 (0.4)      | 1883 |
| 1825 | Thiamazole                         | 0                | 0               | 0               | 1/113 (0.9)      | 2/484 (0.4)      | 1884 |
| 1826 | Birth control                      | 0                | 0               | 0               | 1/113 (0.9)      | 1/484 (0.2)      | 1885 |
| 1827 | Estradiol                          | 0                | 0               | 0               | 0                | 1/484 (0.2)      | 1886 |
| 1828 | Ethinylestradiol with norgestimate | 0                | 0               | 0               | 1/113 (0.9)      | 0                | 1887 |
| 1829 | Diabetes                           | 0                | 0               | 0               | 2/113 (1.8)      | 2/484 (0.4)      | 1888 |
|      | Glibenclamide                      | 0                | 0               | 0               | 0                | 1/484 (0.2)      |      |
|      | Metformin                          | 0                | 0               | 0               | 1/113 (0.9)      | 1/484 (0.2)      |      |
|      | Sitagliptin                        | 0                | 0               | 0               | 1/113 (0.9)      | 0                |      |
|      | Hormone replacement                | 0                | 0               | 0               | 0                | 1/484 (0.2)      |      |
|      | Testosterone                       | 0                | 0               | 0               | 0                | 1/484 (0.2)      |      |

Supplementary Table 1. Continued

| 1889 |                            |                  |                 |                 |                  |                  | 1948 |
|------|----------------------------|------------------|-----------------|-----------------|------------------|------------------|------|
| 1890 |                            |                  |                 |                 |                  |                  | 1949 |
| 1891 | Primary implicated class   | Liver transplant | Liver-related   | Non-liver-      | Subjects with    | Subjects         | 1950 |
| 1892 | Secondary implicated class | recipient        | death           | related death   | follow-up        | with follow-up   | 1951 |
| 1893 | Primary implicated agent   | (n = 30), n (%)  | (n = 17), n (%) | (n = 15), n (%) | (chronic)        | (nonchronic)     | 1952 |
| 1894 |                            |                  |                 |                 | (n = 113), n (%) | (n = 485), n (%) | 1953 |
| 1895 | Immunosuppression          | 0                | 0               | 0               | 0                | 1/484 (0.2)      | 1954 |
| 1896 | Methylprednisolone         | 0                | 0               | 0               | 0                | 1/484 (0.2)      | 1955 |
| 1897 | Osteoporosis               | 0                | 0               | 0               | 1/113 (0.9)      | 0                | 1956 |
| 1898 | Zoledronic acid            | 0                | 0               | 0               | 1/113 (0.9)      | 0                | 1957 |
| 1899 | Other                      | 2/30 (6.7)       | 1/17 (5.9)      | 1/15 (6.7)      | 9/113 (8.0)      | 22/484 (4.5)     | 1958 |
| 1900 | Alcohol addition           | 0                | 0               | 0               | 0                | 2/484 (0.4)      | 1959 |
| 1901 | Disulfiram                 | 0                | 0               | 0               | 0                | 2/484 (0.4)      | 1960 |
| 1902 | Anti-BPH                   | 0                | 0               | 0               | 0                | 1/484 (0.2)      | 1961 |
| 1903 | Alfuzosin                  | 0                | 0               | 0               | 0                | 1/484 (0.2)      | 1962 |
| 1904 | Anticoagulant              | 0                | 0               | 0               | 0                | 2/484 (0.4)      | 1963 |
| 1905 | Dalteparin                 | 0                | 0               | 0               | 0                | 1/484 (0.2)      | 1964 |
| 1906 | Prasugrel                  | 0                | 0               | 0               | 0                | 1/484 (0.2)      | 1965 |
| 1907 | Anti-emetic                | 1/30 (3.3)       | 0               | 0               | 0                | 0                | 1966 |
| 1908 | Promethazine               | 1/30 (3.3)       | 0               | 0               | 0                | 0                | 1967 |
| 1909 | Anti-gout                  | 0                | 0               | 1/15 (6.7)      | 1/113 (0.9)      | 4/484 (0.8)      | 1968 |
| 1910 | Allopurinol                | 0                | 0               | 1/15 (6.7)      | 1/113 (0.9)      | 3/484 (0.6)      | 1969 |
| 1911 | Febuxostat                 | 0                | 0               | 0               | 0                | 1/484 (0.2)      | 1970 |
| 1912 | Anti-ulcer                 | 0                | 0               | 0               | 3/113 (2.7)      | 3/484 (0.6)      | 1971 |
| 1913 | Esomeprazole               | 0                | 0               | 0               | 1/113 (0.9)      | 0                | 1972 |
| 1914 | Lansoprazole               | 0                | 0               | 0               | 1/113 (0.9)      | 0                | 1973 |
| 1915 | Omeprazole                 | 0                | 0               | 0               | 1/113 (0.9)      | 0                | 1974 |
| 1916 | Ranitidine                 | 0                | 0               | 0               | 0                | 3/484 (0.6)      | 1975 |
| 1917 | Asthma                     | 0                | 0               | 0               | 1/113 (0.9)      | 3/484 (0.6)      | 1976 |
| 1918 | Montelukast                | 0                | 0               | 0               | 1/113 (0.9)      | 3/484 (0.6)      | 1977 |
| 1919 | Copper overload            | 0                | 0               | 0               | 1/113 (0.9)      | 0                | 1978 |
| 1920 | Penicillamine              | 0                | 0               | 0               | 1/113 (0.9)      | 0                | 1979 |
| 1921 | Gastrointestinal motility  | 0                | 0               | 0               | 1/113 (0.9)      | 0                | 1980 |
| 1922 | Metoclopramide             | 0                | 0               | 0               | 1/113 (0.9)      | 0                | 1981 |
| 1923 | Inflammatory bowel disease | 0                | 0               | 0               | 1/113 (0.9)      | 0                | 1982 |
| 1924 | Mesalazine                 | 0                | 0               | 0               | 1/113 (0.9)      | 0                | 1983 |
| 1925 | Iron overload              | 0                | 0               | 0               | 0                | 1/484 (0.2)      | 1984 |
| 1926 | Deferasirox                | 0                | 0               | 0               | 0                | 1/484 (0.2)      | 1985 |
| 1927 | Obesity                    | 0                | 1/17 (5.9)      | 0               | 0                | 0                | 1986 |
| 1928 | Phentermine                | 0                | 1/17 (5.9)      | 0               | 0                | 0                | 1987 |
| 1929 | Psoriasis                  | 0                | 0               | 0               | 0                | 3/484 (0.6)      | 1988 |
| 1930 | Acitretin                  | 0                | 0               | 0               | 0                | 3/484 (0.6)      | 1989 |
| 1931 | Pulmonary hypertension     | 0                | 0               | 0               | 0                | 1/484 (0.2)      | 1990 |
| 1932 | Bosentan                   | 0                | 0               | 0               | 0                | 1/484 (0.2)      | 1991 |
| 1933 | Rheumatoid arthritis       | 1/30 (3.3)       | 0               | 0               | 1/113 (0.9)      | 2/484 (0.4)      | 1992 |
| 1934 | Leflunomide                | 1/30 (3.3)       | 0               | 0               | 1/113 (0.9)      | 2/484 (0.4)      | 1993 |
| 1935 |                            |                  |                 |                 |                  |                  | 1994 |
| 1936 |                            |                  |                 |                 |                  |                  | 1995 |
| 1937 |                            |                  |                 |                 |                  |                  | 1996 |
| 1938 |                            |                  |                 |                 |                  |                  | 1997 |
| 1939 |                            |                  |                 |                 |                  |                  | 1998 |
| 1940 |                            |                  |                 |                 |                  |                  | 1999 |
| 1941 |                            |                  |                 |                 |                  |                  | 2000 |
| 1942 |                            |                  |                 |                 |                  |                  | 2001 |
| 1943 |                            |                  |                 |                 |                  |                  | 2002 |
| 1944 |                            |                  |                 |                 |                  |                  | 2003 |
| 1945 |                            |                  |                 |                 |                  |                  | 2004 |
| 1946 |                            |                  |                 |                 |                  |                  | 2005 |
| 1947 |                            |                  |                 |                 |                  |                  | 2006 |

<sup>a</sup>Individual HDS products were not listed.

Type of file: figure

Label: 01

Filename: Figure2Final.jpg

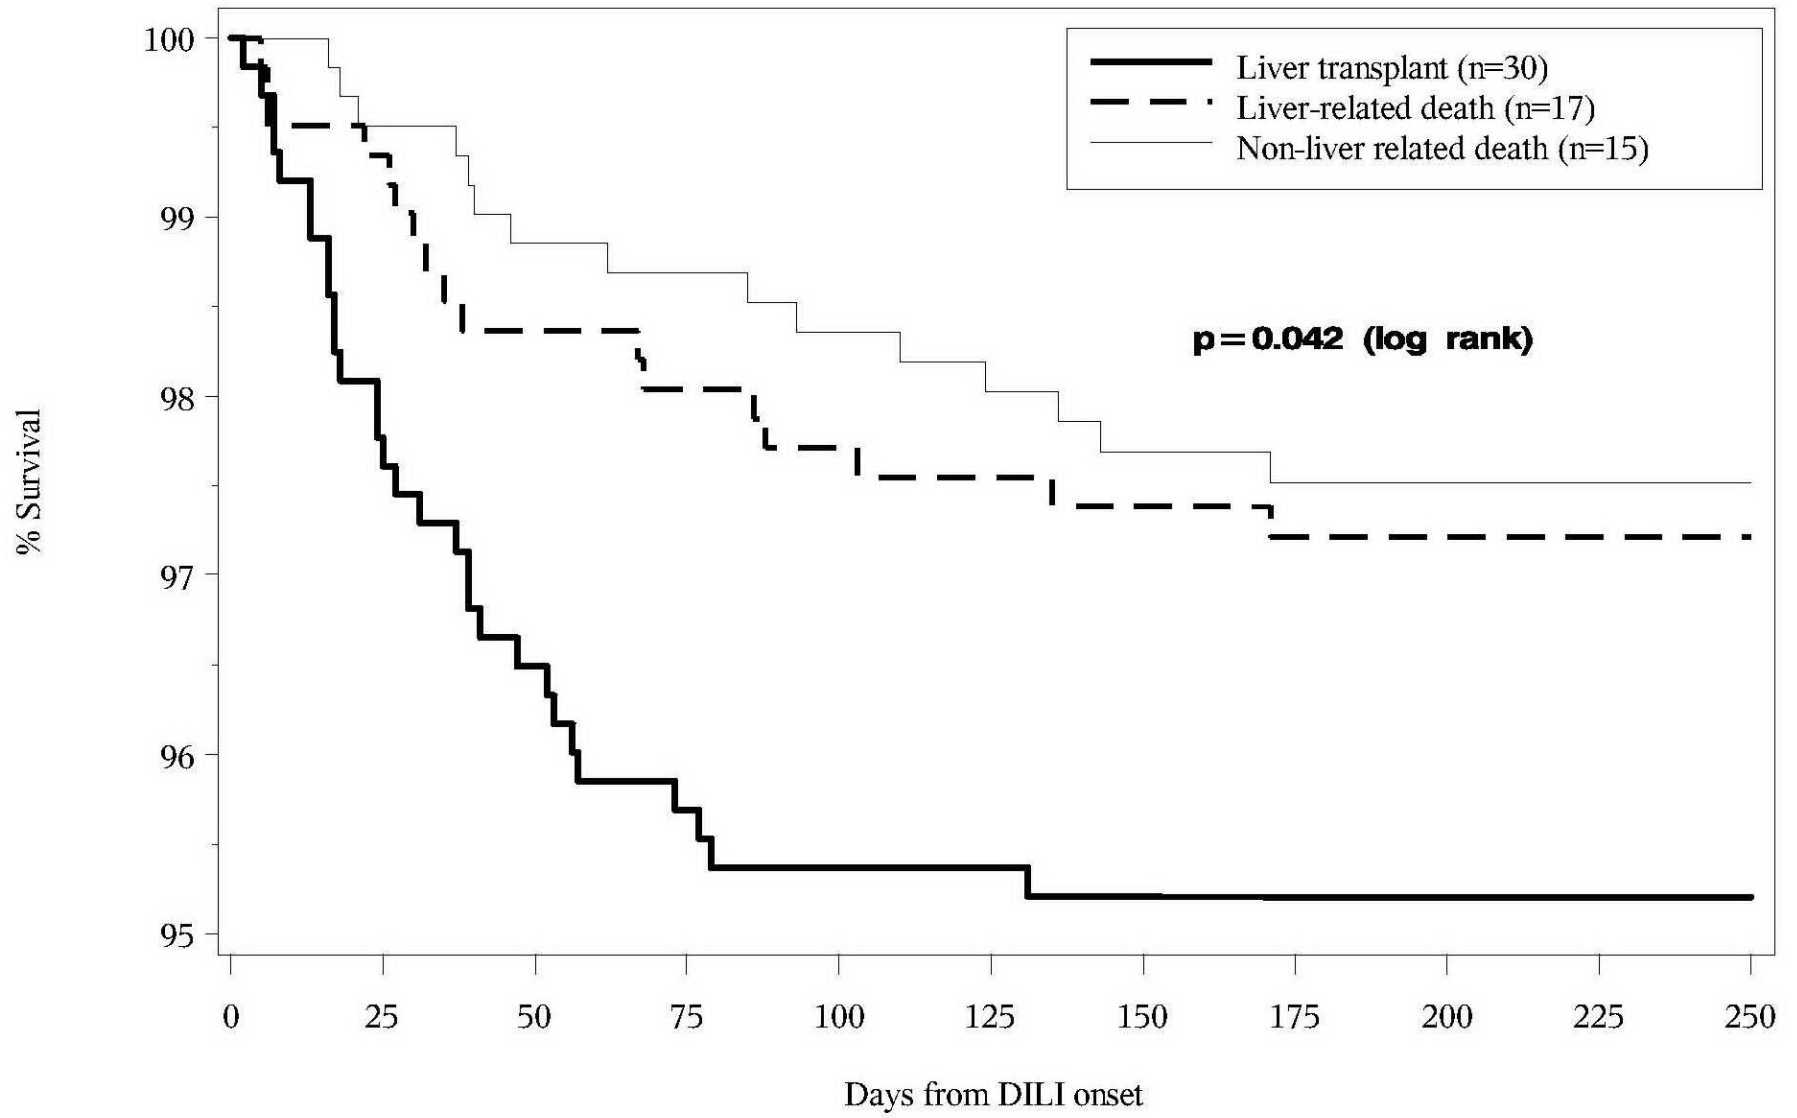

Supplement: NIHMS580450-supplement-supplement_1.pdf [file NIHMS580450-supplement-supplement_1.pdf]
